# Supplementary material
Source: MDPI journal article supplement (https://www.mdpi.com/2077-1312/11/10/2006)
Supplement: s1 [file s1]

## Supplementary tables

**Table S1.** Health index scores and calculation.

| Health indicator                                      | Chengue  | Score | Inca Inca | Score |
|-------------------------------------------------------|----------|-------|-----------|-------|
| Coral cover mean %                                    | 74.56    | 5     | 72.00     | 5     |
| Macroalgae cover mean %                               | 22.22    | 3     | 10.94     | 4     |
| Vibrios proportion in tissue mean UFC*g <sup>-1</sup> | 1.00E+05 | 3     | 1.00E+07  | 2     |
| Health Index Mean                                     | -        | 3.67  | -         | 3.67  |

**Table S2.** PERMANOVA analysis of the microbiological data.

| Data set (between sites)                | Correlation analysis (Draftsman plot) | Transformation | Resemblance            | PERMANOVA test         | SS     | Pseudo-F | df | P value      |
|-----------------------------------------|---------------------------------------|----------------|------------------------|------------------------|--------|----------|----|--------------|
| Microbiol site                          | No redundancy                         | Fourth root    | Bray-Curtis similarity | Type III, Unrestricted | 4143.2 | 9.74     | 28 | <b>0.001</b> |
| Microbiol health condition              | No redundancy                         | Fourth root    | Bray-Curtis similarity | Type III, Unrestricted | 681.57 | 1.60     | 28 | 0.188        |
| Microbiol compartment                   | No redundancy                         | Fourth root    | Bray-Curtis similarity | Type III, Unrestricted | 14743  | 34.68    | 28 | <b>0.001</b> |
| Microbiol vibrios site                  | No redundancy                         | Log (X+1)      | Bray-Curtis similarity | Type III, Unrestricted | 1938.2 | 14.41    | 26 | <b>0.001</b> |
| Microbiol vibrios health condition      | No redundancy                         | Log (X+1)      | Bray-Curtis similarity | Type III, Unrestricted | 370.96 | 2.75     | 26 | 0.097        |
| Microbiol vibrios compartment           | No redundancy                         | Log (X+1)      | Bray-Curtis similarity | Type III, Unrestricted | 16377  | 121.77   | 26 | <b>0.001</b> |
| Microbiol heterotrophs site             | No redundancy                         | Log (X+1)      | Bray-Curtis similarity | Type III, Unrestricted | 5259.8 | 31.66    | 27 | <b>0.001</b> |
| Microbiol heterotrophs health condition | No redundancy                         | Log (X+1)      | Bray-Curtis similarity | Type III, Unrestricted | 649.45 | 3.91     | 27 | 0.057        |
| Microbiol heterotrophs compartment      | No redundancy                         | Log (X+1)      | Bray-Curtis similarity | Type III, Unrestricted | 13853  | 83.4     | 27 | <b>0.001</b> |

**Table S3.** PERMANOVA analysis of the environmental and biological-coverage data.

| Data set (between sites)             | Correlation analysis (Draftsman plot)    | Transformation | Resemblance            | PERMANOVA test         | SS    | Pseudo-F | df  | P value      |
|--------------------------------------|------------------------------------------|----------------|------------------------|------------------------|-------|----------|-----|--------------|
| <b>Environmental</b>                 | Redundancy between orthofosfates and SST | Log (X+1)      | Euclidean distance     | Type III, Unrestricted | 19.62 | 3.09     | 5   | 0.096        |
| <b>Overall coverage</b>              | No redundancy                            | Square root    | Bray-Curtis similarity | Type III, Unrestricted | 14444 | 24.17    | 119 | <b>0.001</b> |
| <i>Madracis</i> coverage             | N/A                                      | Square root    | Bray-Curtis similarity | Type III, Unrestricted | 8.55  | 0.11     | 119 | 0.795        |
| <b>Coverage (no-<i>Madracis</i>)</b> | No redundancy                            | Square root    | Bray-Curtis similarity | Type III, Unrestricted | 55789 | 27.45    | 115 | <b>0.001</b> |

**Table S4.** DistLM analyses of the RDA model of the environmental and biological data.

| Variables      | R <sup>2</sup> Adj | R <sup>2</sup> Adj Ac | Pseudo-F | df | p Value      |
|----------------|--------------------|-----------------------|----------|----|--------------|
| Orthophosphate | 0.41               | 0.53                  | 4.52     | 4  | <b>0.042</b> |
| Nitrates       | 0.82               | 0.96                  | 2.15     | 4  | 0.319        |
| Nitrites       | 0.46               | 0.68                  | 1.36     | 4  | 0.320        |
| pH             | 0.71               | 0.89                  | 3.62     | 4  | 0.098        |

**Table S5.** Chi<sup>2</sup> analysis of the biological interaction data.

| Pair interaction                               | X <sup>2</sup> | df | p Value      |
|------------------------------------------------|----------------|----|--------------|
| <i>M. auretenra</i> -filamentous/cyanobacteria | 7,54           | 1  | <b>0,006</b> |
| <i>M. auretenra</i> -fleshy                    | 26,93          | 1  | <b>0,000</b> |
| <i>M. auretenra</i> -CCA                       | 41,73          | 1  | <b>0,000</b> |
| <i>M. auretenra</i> -other hard coral          | 2,03           | 1  | 0,153        |
| <i>M. auretenra</i> -soft coral                | 7,43           | 1  | <b>0,006</b> |
| <i>M. auretenra</i> -sponge                    | 25,28          | 1  | <b>0,000</b> |
| <i>M. auretenra</i> -other invertebrate        | 0,53           | 1  | 0,464        |

**Table S6.** Environmental conditions in the patches of *Madracis auretenra* at both sites. S1: Chengue, S2: Inca Inca, T: Temperature, S: Salinity, TSS: Total suspended solids.

| Site | Replicate | Depth (m) | T (°C) | S     | pH   | O <sub>2</sub> (%) | O <sub>2</sub> (mg*L <sup>-1</sup> ) | Ammonia (µg L <sup>-1</sup> ) | Phosphates (µg L <sup>-1</sup> ) | Nitrates (µg L <sup>-1</sup> ) | Nitrites (µg L <sup>-1</sup> ) | TSS (mg L <sup>-1</sup> ) |
|------|-----------|-----------|--------|-------|------|--------------------|--------------------------------------|-------------------------------|----------------------------------|--------------------------------|--------------------------------|---------------------------|
| S1   | 1         | 9.20      | 26.40  | 36.10 | 8.91 | 72.00              | 5.62                                 | 10.00                         | 2.00                             | 2.10                           | 0.91                           | 3.69                      |
| S1   | 2         | 11.34     | 26.20  | 36.30 | 8.18 | 67.60              | 6.01                                 | 10.00                         | 2.00                             | 5.58                           | 1.46                           | 3.61                      |
| S1   | 3         | 8.46      | 26.50  | 36.20 | 8.63 | 79.50              | 6.30                                 | 11.60                         | 2.00                             | 7.25                           | 1.58                           | 3.57                      |
| S2   | 1         | 3.96      | 25.90  | 36.30 | 8.35 | 65.00              | 5.39                                 | 11.60                         | 3.28                             | 21.70                          | 1.63                           | 1.40                      |
| S2   | 2         | 3.96      | 26.60  | 36.10 | 8.34 | 81.70              | 5.70                                 | 11.80                         | 3.09                             | 20.05                          | 1.43                           | 1.77                      |
| S2   | 3         | 5.43      | 26.40  | 36.40 | 8.39 | 63.00              | 5.22                                 | 13.40                         | 2.83                             | 21.60                          | 1.56                           | 1.62                      |

**Table S7.** Counts of total vibrios and heterotrophs. S1: Chengue, S2: Inca Inca, S: Healthy, E: Diseased, M: Mucus, T: Tissue.

| Site | Condition | Compartment | Total vibrios |                 |                                         | Total Heterotrophs |                 |                                         |
|------|-----------|-------------|---------------|-----------------|-----------------------------------------|--------------------|-----------------|-----------------------------------------|
|      |           |             | Count         | Dilution factor | UFC*ml <sup>-1</sup> or g <sup>-1</sup> | Count              | Dilution factor | UFC*ml <sup>-1</sup> or g <sup>-1</sup> |
| S1   | S         | M           | 17            | 1.00E+03        | 1.70E+04                                | 3                  | 1.00E+03        | 3.00E+03                                |
| S1   | S         | M           | 0             | 1.00E+04        | 0.00E+00                                | 0                  | 1.00E+04        | 0.00E+00                                |
| S1   | S         | T           | 25            | 1.00E+03        | 2.47E+06                                | 4                  | 1.00E+03        | 3.95E+05                                |
| S1   | S         | T           | 0             | 1.00E+04        | 0.00E+00                                | 2                  | 1.00E+03        | 1.97E+05                                |
| S1   | E         | M           | 30            | 1.00E+03        | 3.00E+04                                | 7                  | 1.00E+03        | 7.00E+03                                |
| S1   | E         | M           | 3             | 1.00E+03        | 3.00E+03                                | 8                  | 1.00E+03        | 8.00E+03                                |
| S1   | E         | T           | 1             | 1.00E+04        | 9.87E+05                                | 5                  | 1.00E+03        | 4.93E+05                                |
| S1   | E         | T           | 0             | 1.00E+04        | 0.00E+00                                | 12                 | 1.00E+03        | 1.18E+06                                |
| S1   | S         | M           | 1             | 1.00E+04        | 1.00E+04                                | 3                  | 1.00E+03        | 3.00E+03                                |
| S1   | S         | M           | 0             | 1.00E+04        | 0.00E+00                                | 0                  | 1.00E+04        | 0.00E+00                                |
| S1   | S         | T           | 9             | 1.00E+03        | 8.88E+05                                | 0                  | 1.00E+04        | 0.00E+00                                |
| S1   | S         | T           | 0             | 1.00E+04        | 0.00E+00                                | 0                  | 1.00E+04        | 0.00E+00                                |

|    |   |   |    |          |          |     |          |          |
|----|---|---|----|----------|----------|-----|----------|----------|
| S1 | E | M | 24 | 1.00E+02 | 2.40E+03 | 36  | 1.00E+02 | 3.60E+03 |
| S1 | E | M | 21 | 1.00E+02 | 2.10E+03 | 42  | 1.00E+02 | 4.20E+03 |
| S1 | E | T | 5  | 1.00E+04 | 4.93E+06 | 34  | 1.00E+04 | 3.36E+07 |
| S1 | E | T | 4  | 1.00E+04 | 3.95E+06 | 21  | 1.00E+04 | 2.07E+07 |
| S2 | S | M | 7  | 1.00E+04 | 7.0E+04  | 27  | 1.00E+04 | 2.70E+05 |
| S2 | S | M | 3  | 1.00E+04 | 3.0E+04  | 4   | 1.00E+04 | 4.00E+04 |
| S2 | S | T | 4  | 1.00E+04 | 3.9E+06  | 12  | 1.00E+04 | 1.18E+07 |
| S2 | S | T | 6  | 1.00E+04 | 5.9E+06  | 17  | 1.00E+04 | 1.68E+07 |
| S2 | E | M | 34 | 1.00E+04 | 3.4E+05  | 51  | 1.00E+04 | 5.10E+05 |
| S2 | E | M | 41 | 1.00E+04 | 4.1E+05  | 32  | 1.00E+04 | 3.20E+05 |
| S2 | E | T | 47 | 1.00E+03 | 4.6E+06  | 23  | 1.00E+03 | 2.27E+06 |
| S2 | E | T | 33 | 1.00E+03 | 3.3E+06  | 31  | 1.00E+03 | 3.06E+06 |
| S2 | S | M | 40 | 1.00E+03 | 4.0E+04  | 37  | 1.00E+03 | 3.70E+04 |
| S2 | S | M | 11 | 1.00E+03 | 1.1E+04  | 125 | 1.00E+03 | 1.25E+05 |
| S2 | S | T | 10 | 1.00E+04 | 9.9E+06  | 32  | 1.00E+04 | 3.16E+07 |
| S2 | S | T | 10 | 1.00E+04 | 9.9E+06  | 12  | 1.00E+04 | 1.18E+07 |
| S2 | E | M | 18 | 1.00E+04 | 1.8E+05  | 24  | 1.00E+04 | 2.40E+05 |
| S2 | E | M | 24 | 1.00E+04 | 2.4E+05  | 42  | 1.00E+04 | 4.20E+05 |
| S2 | E | T | 36 | 1.00E+04 | 3.6E+07  | 37  | 1.00E+04 | 3.65E+07 |
| S2 | E | T | 89 | 1.00E+04 | 8.8E+07  | 23  | 1.00E+04 | 2.27E+07 |

**Table S8.** Coverage (%) of the benthic categories associated with the *Madracis auretenra* patches. CCA: Crustose coralline algae.

|                           | Chengue |      |      | Inca Inca |      |      |
|---------------------------|---------|------|------|-----------|------|------|
| Coverage (%)              | Mean    | SD   | SE   | Mean      | SD   | SE   |
| <i>Madracis auretenra</i> | 72.22   | 9.43 | 5.45 | 71.94     | 6.53 | 3.77 |
| Other hard coral          | 2.33    | 2.96 | 1.71 | 0.06      | 0.10 | 0.06 |
| Soft coral                | 1.78    | 3.08 | 1.78 | 0.00      | 0.00 | 0.00 |
| Filamentous/cyanobacteria | 11.39   | 1.58 | 0.91 | 5.72      | 4.61 | 2.66 |

|                   |      |      |      |       |      |      |
|-------------------|------|------|------|-------|------|------|
| Fleshy            | 7.44 | 9.61 | 5.55 | 0.00  | 0.00 | 0.00 |
| CCA               | 3.39 | 2.78 | 1.60 | 5.22  | 0.79 | 0.45 |
| Erect sponge      | 0.06 | 0.10 | 0.06 | 1.67  | 2.03 | 1.17 |
| Encrusting sponge | 0.06 | 0.10 | 0.06 | 1.44  | 1.25 | 0.72 |
| Sand              | 0.56 | 0.82 | 0.47 | 4.61  | 3.87 | 2.24 |
| Gap               | 0.11 | 0.10 | 0.06 | 0.50  | 0.17 | 0.10 |
| Coral rubble      | 0.67 | 1.01 | 0.59 | 8.83  | 3.56 | 2.06 |
| Sponges           | 0.11 | 0.10 | 0.06 | 3.11  | 1.00 | 0.58 |
| Abiotic substrate | 1.33 | 1.88 | 1.08 | 13.94 | 3.73 | 2.15 |

**Table S9.** Frequency of contact (%) between *M. auretenra* and other benthic categories. CCA: Crustose coralline algae.

|                                            | Chengue |       |      | Inca Inca |       |      |
|--------------------------------------------|---------|-------|------|-----------|-------|------|
| Contact (%)                                | Mean    | SD    | SE   | Mean      | SD    | SE   |
| <i>Madracis</i> -filamentous/cyanobacteria | 24.75   | 17.99 | 2.32 | 11.23     | 15.23 | 1.97 |
| <i>Madracis</i> -fleshy                    | 12.28   | 20.93 | 2.70 | 0.00      | 0.00  | 0.00 |
| <i>Madracis</i> -CCA                       | 17.78   | 13.58 | 1.75 | 2.66      | 8.81  | 1.14 |
| <i>Madracis</i> -hard coral                | 0.27    | 1.62  | 0.21 | 0.00      | 0.00  | 0.00 |
| <i>Madracis</i> -soft coral                | 5.73    | 17.69 | 2.28 | 0.00      | 0.00  | 0.00 |
| <i>Madracis</i> -sponge                    | 0.20    | 1.15  | 0.15 | 7.00      | 12.47 | 1.61 |
| <i>Madracis</i> -other invertebrate        | 7.06    | 9.30  | 1.20 | 5.52      | 8.32  | 1.07 |
| No contact                                 | 31.93   | 24.61 | 3.18 | 73.60     | 21.74 | 2.81 |
